# Supplementary material for: Photocurrent generation by immobilized cyanobacteria via direct electron transport in photo-bioelectrochemical cells
Source: Royal Society of Chemistry journal article supplement (doi:10.1039/c4cp00494a), 2014-01-01
Supplement: c4cp00494a1.pdf [file c4cp00494a1.pdf]

## Supplementary data

### Photocurrent Generation by Immobilized Cyanobacteria via Direct Electron Transport in Photo-Bioelectrochemical Cells

Narendran Sekar, Yogeswaran Umasankar and Ramaraja P. Ramasamy\*

*Nano Electrochemistry Laboratory, College of Engineering, University of Georgia, Athens, GA 30602, United States.*

\* Ramaraja P. Ramasamy, E-mail: rama@uga.edu, Fax: +1-706-542-3804

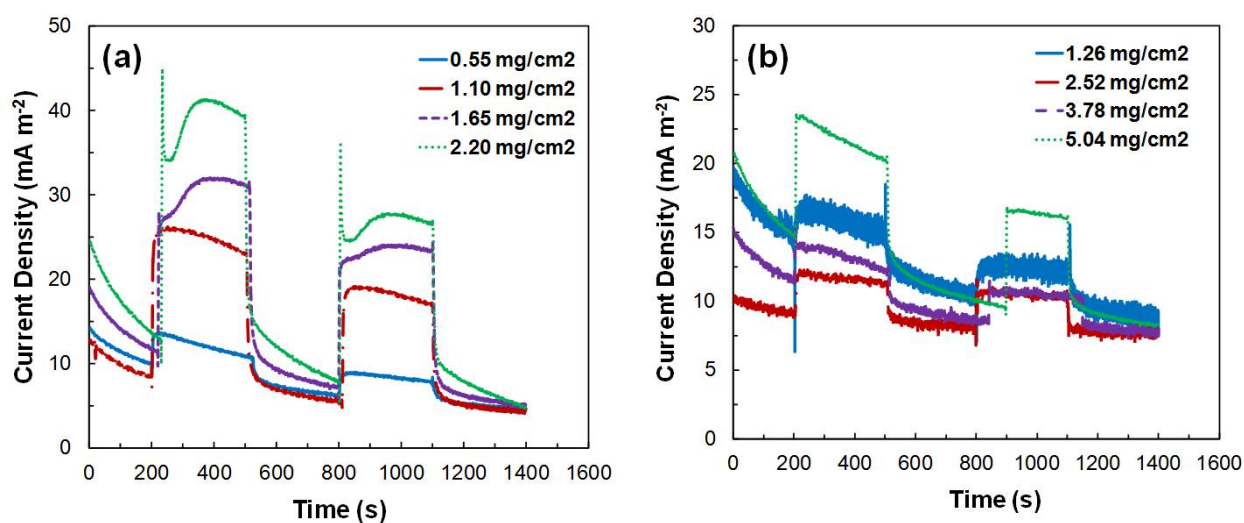

**Fig. S1.** Optimization of cyanobacteria loading on the CNT modified electrodes for the photocurrent generation: (a) NOS and (b) AV. The photocurrent density increased loading until 2.2 mg cm<sup>-2</sup> and 5.04 mg cm<sup>-2</sup> for both NOS and AV respectively beyond which the photocurrents decreased.

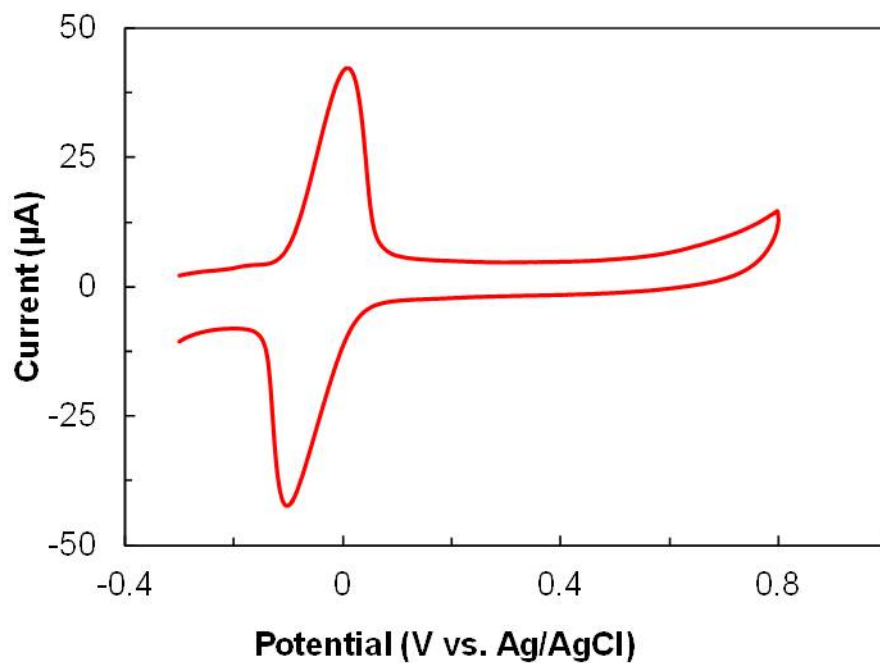

**Fig. S2.** Cyclic voltammogram showing redox peaks of DBMIB

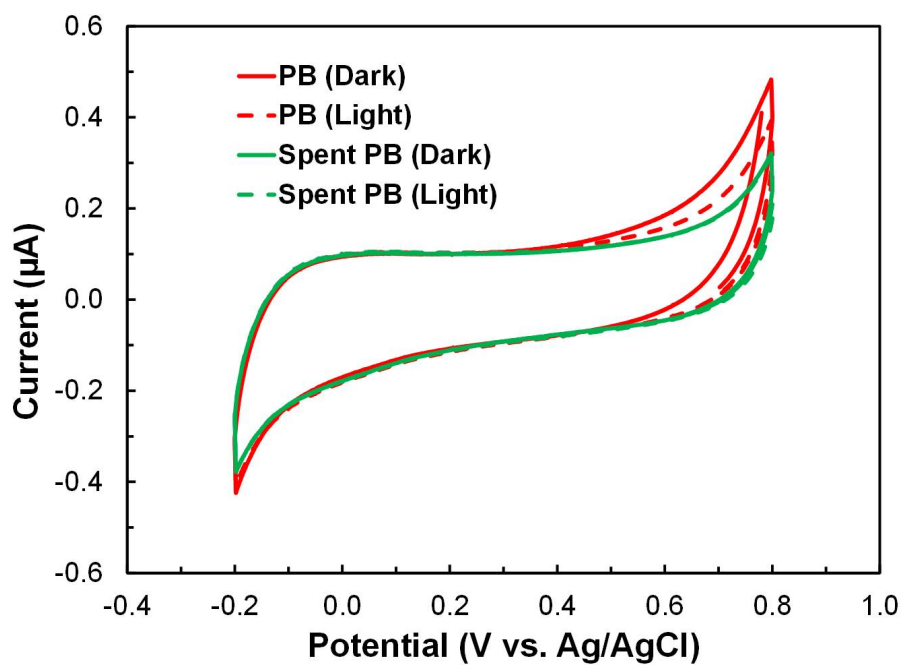

**Fig. S3.** Cyclic voltammograms of fresh phosphate buffer (PB) and spent phosphate buffer (Spent PB) under dark and light conditions

**Table S1:** Fluorescence measurement of NOS for examining the accessory photosynthetic pigments.

| S. No. | Excitation wavelength | Emission wavelength | Control | NOS | Fluorophore     |
|--------|-----------------------|---------------------|---------|-----|-----------------|
| 1      | 590 ( $\pm 10$ )      | 645 ( $\pm 20$ )    | 0       | 370 | C-Phycocyanin   |
| 2      | 530 ( $\pm 12.5$ )    | 645 ( $\pm 20$ )    | 0       | 91  | R-Phycocyanin   |
| 3      | 530 ( $\pm 12.5$ )    | 590 ( $\pm 17.5$ )  | 0       | 22  | B-Phycoerythrin |
